# Supplementary material for: Supercapacitive performance of TiO2 boosted by a unique porous TiO2/Ti network and activated Ti3+
Source: Royal Society of Chemistry journal article supplement (doi:10.1039/c8ra10671a), 2019-01-01
Supplement: c8ra10671a1.pdf [file c8ra10671a1.pdf]

## Supporting Information

### Supercapacitive Performance of TiO<sub>2</sub> Boosted by Unique Porous TiO<sub>2</sub>/Ti Network and Activated Ti<sup>3+</sup>

Qi Wang,<sup>a</sup> Musen Li<sup>a</sup> and Zhou Wang<sup>\*a</sup>

<sup>a</sup> Key Laboratory for Liquid-Solid Structural Evolution and Processing of Materials,  
Ministry of Education and School of Materials Science and Engineering,  
Shandong University, Jinan, Shandong 250061, People's Republic of China.

\* Corresponding author: wangzhou@sdu.edu.cn.

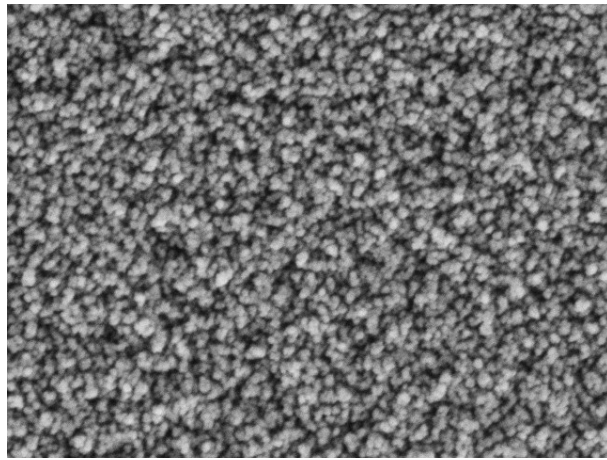

Fig. S1 FE-SEM image of Ti plate oxidized by simply immersed in  $H_2O_2$ .

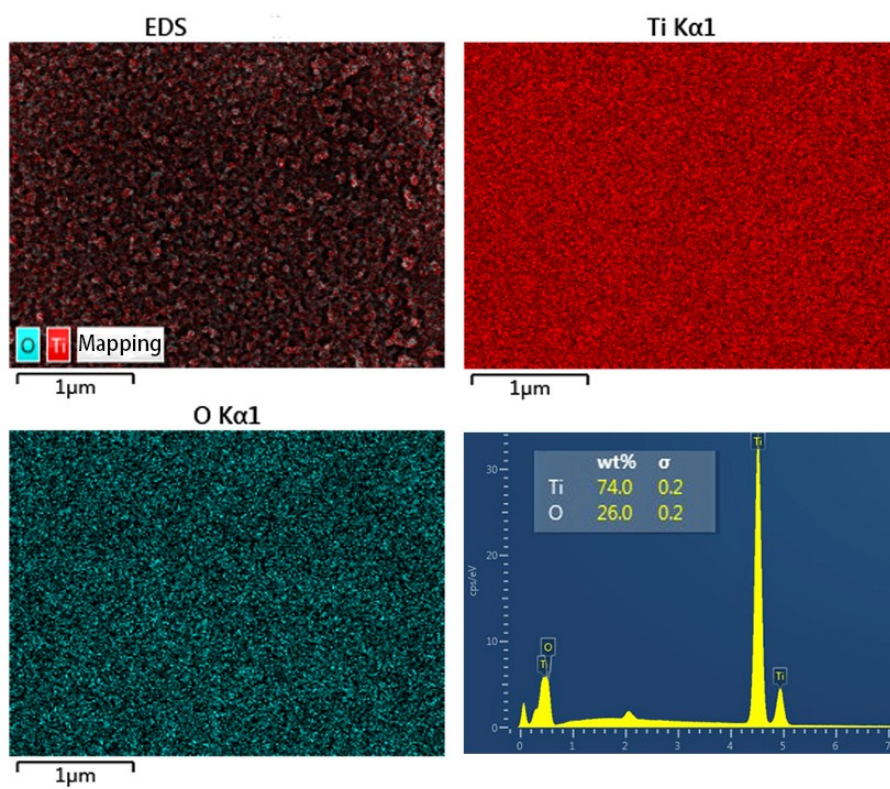

Fig. S2 EDS elemental mapping images of PTT.

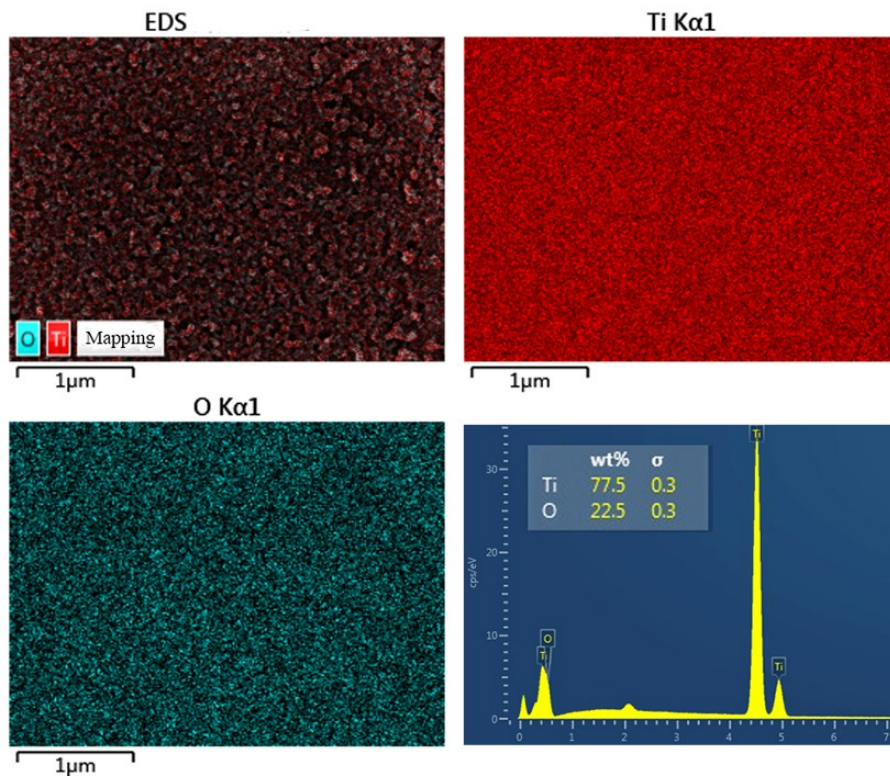

Fig. S3 EDS elemental mapping images of PTT reduced at 500 °C.

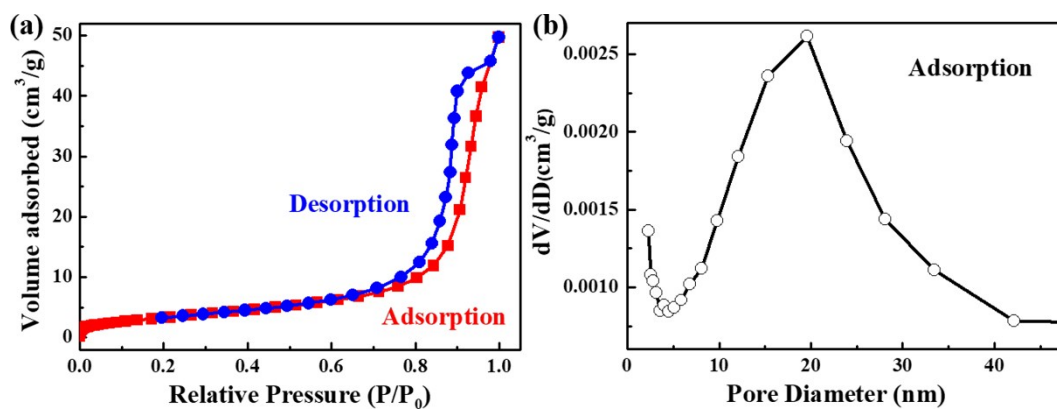

Fig. S4 (a) Nitrogen adsorption-desorption isotherm plots and (b) pore size distributions curve of PTT reduced at 500 °C

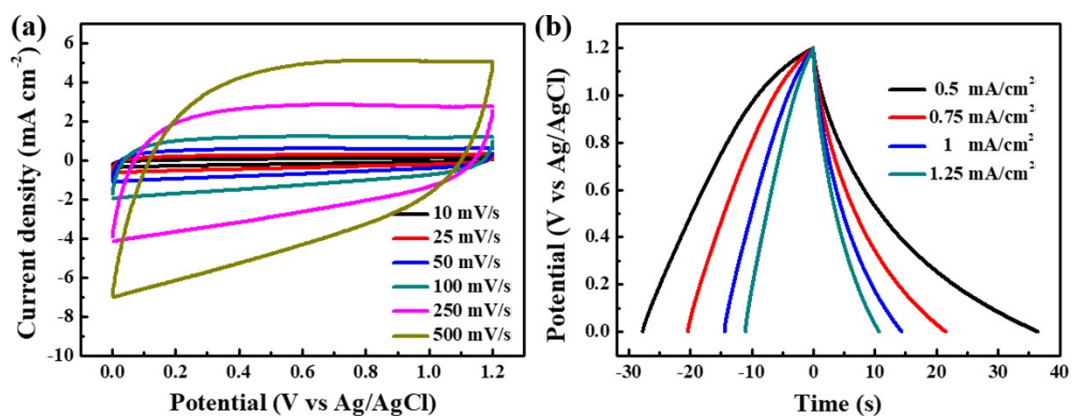

Fig. S5 (a) CV curves of Al-PTT-50//rGO device collected under different scan rates ranging from 10 to 500 mV s<sup>-1</sup>. (b) GCD curves of Al-PTT-50//rGO device collected at different current densities ranging from 0.5 to 1.25 mA cm<sup>-2</sup>.

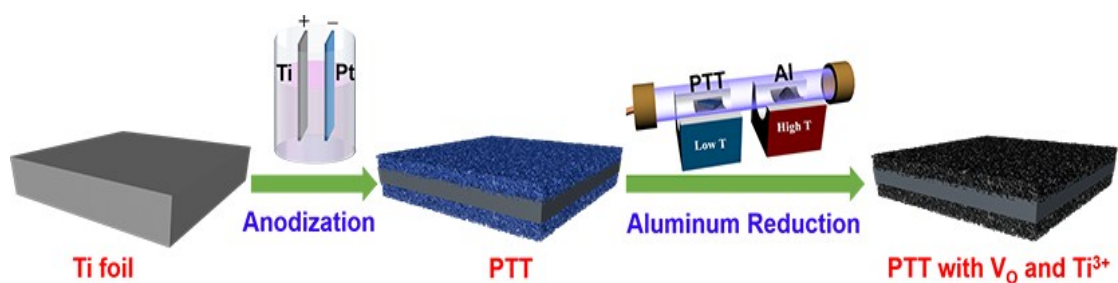

Fig. S6 Sketch of the synthetic route for the samples.
